# Supplementary material for: A Novel Role of Dickkopf-Related Protein 3 in Macropinocytosis in Human Bladder Cancer T24 Cells
Source: Int J Mol Sci. 2016 Nov 5;17(11):1846. doi: 10.3390/ijms17111846 (PMC5133846; doi:10.3390/ijms17111846)
Supplement: Supplementary file 1 [file ijms-17-01846-s001.pdf]

# Supplementary Materials: A Novel Role of Dickkopf-Related Protein in Macropinocytosis in Human Bladder Cancer T24 Cells

Nonoka Tsujimura, Nami O. Yamada, Yuki Kuranaga, Minami Kumazaki, Haruka Shinohara, Kohei Taniguchi and Yukihiro Akao

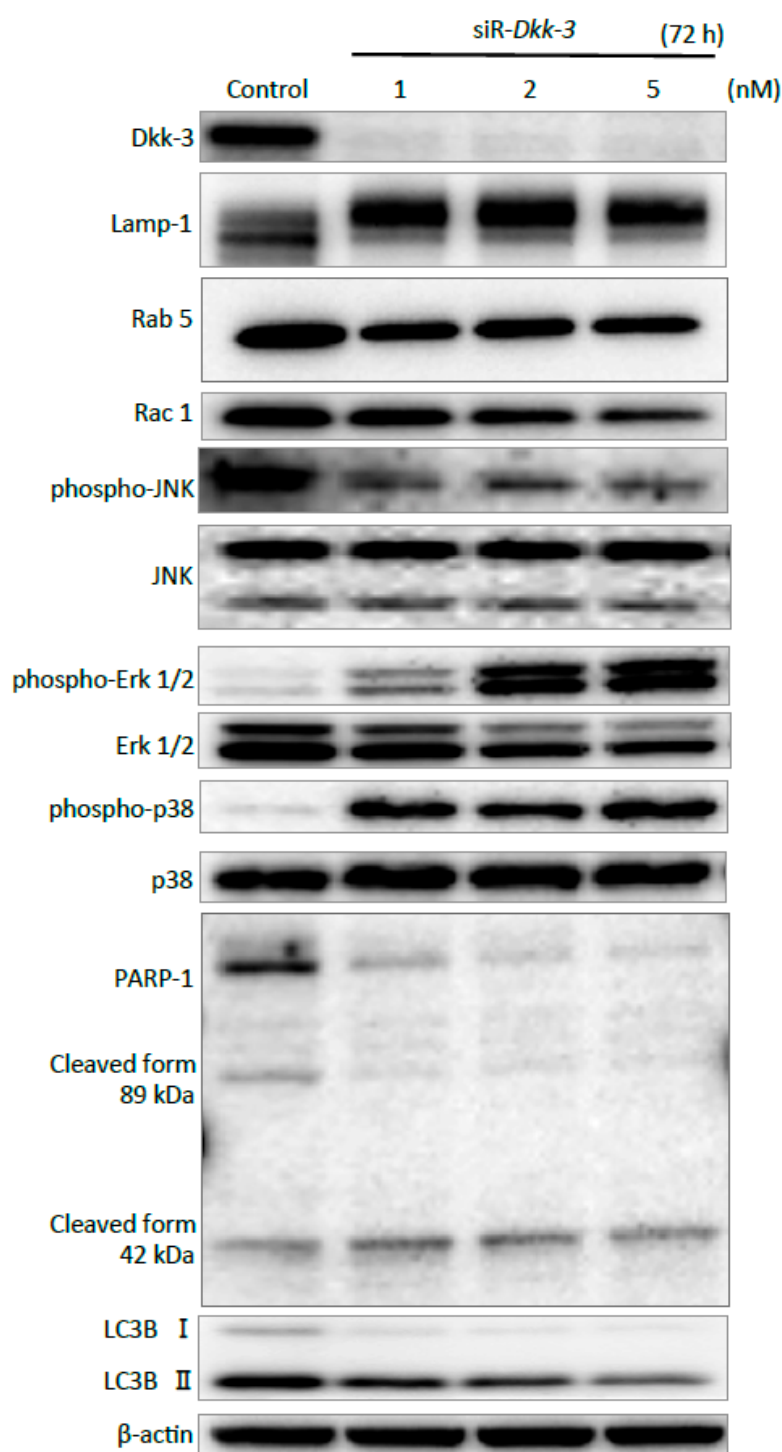

**Figure S1.** Expression profiles of autophagy, apoptosis or macropinocytosis related proteins in T24 cells at 72 h after transfection with non-specific siRNA or siR-Dkk-3.

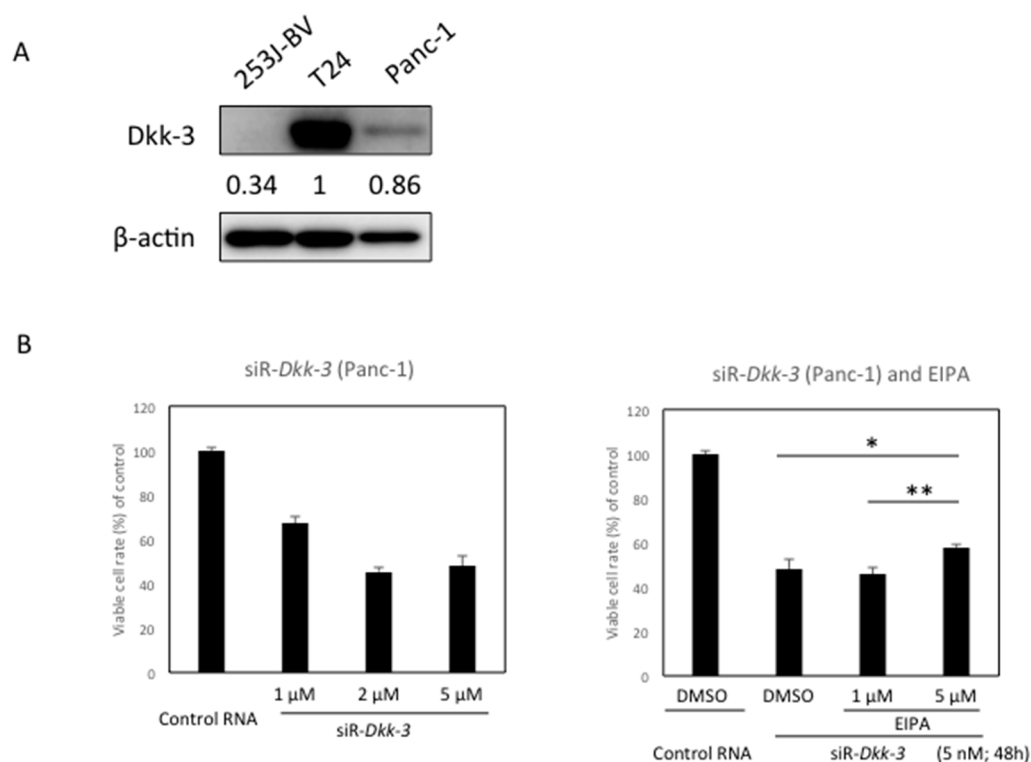

**Figure S2.** Growth inhibitory effects of *Dkk-3* knock-down in Panc-1 cells. (**A,B**) *Dkk-3* expression and Cell viability in Panc-1 cells at 48 h after transfection with non-specific siRNA or siR-*Dkk-3* (1, 2, or 5 nM), which was canceled in part by the co-treatment with EIPA. The *Dkk-3* expression levels were estimated by the densitometric analysis. The *p*-values in (**B**) are indicated as follows: \*  $p < 0.05$  and \*\*  $p < 0.01$ .

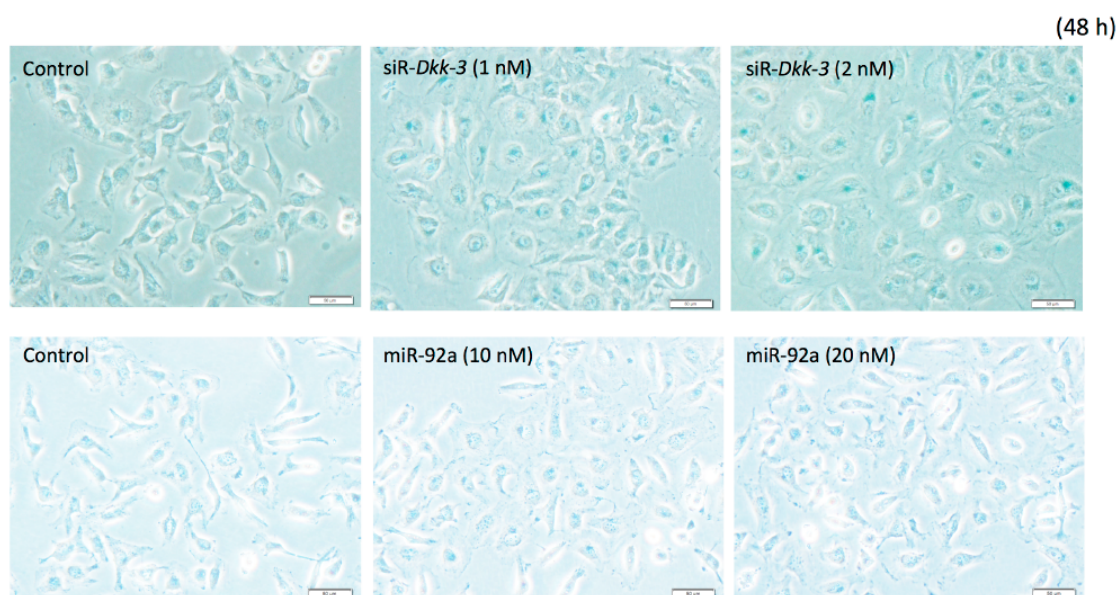

**Figure S3.** Staining for senescence-associated β-galactosidase in T24 cells at 48 h after transfection with non-specific siRNA, siR-*Dkk-3* or miR-92a. Scale bars, 50 μm.

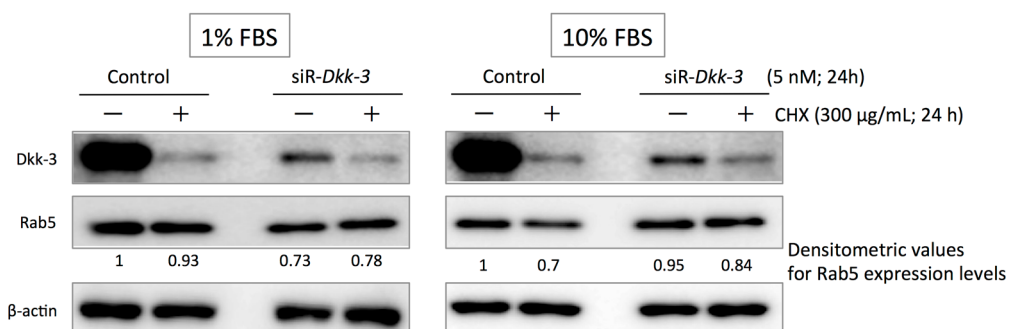

**Figure S4.** Stability of Rab5 protein in T24 cells transfected with non-specific siRNA or siR-*Dkk-3* (5 nM) in different nutritional conditions (1% FBS- or 10% FBS-containing medium). Cells were also treated with CHX (300  $\mu$ g/mL) at the time of transfection.
